# Supplementary material
Source: PubMed Central journal article supplement (PMC9462657)

Supplementary Figure 1 Study Flow Chart

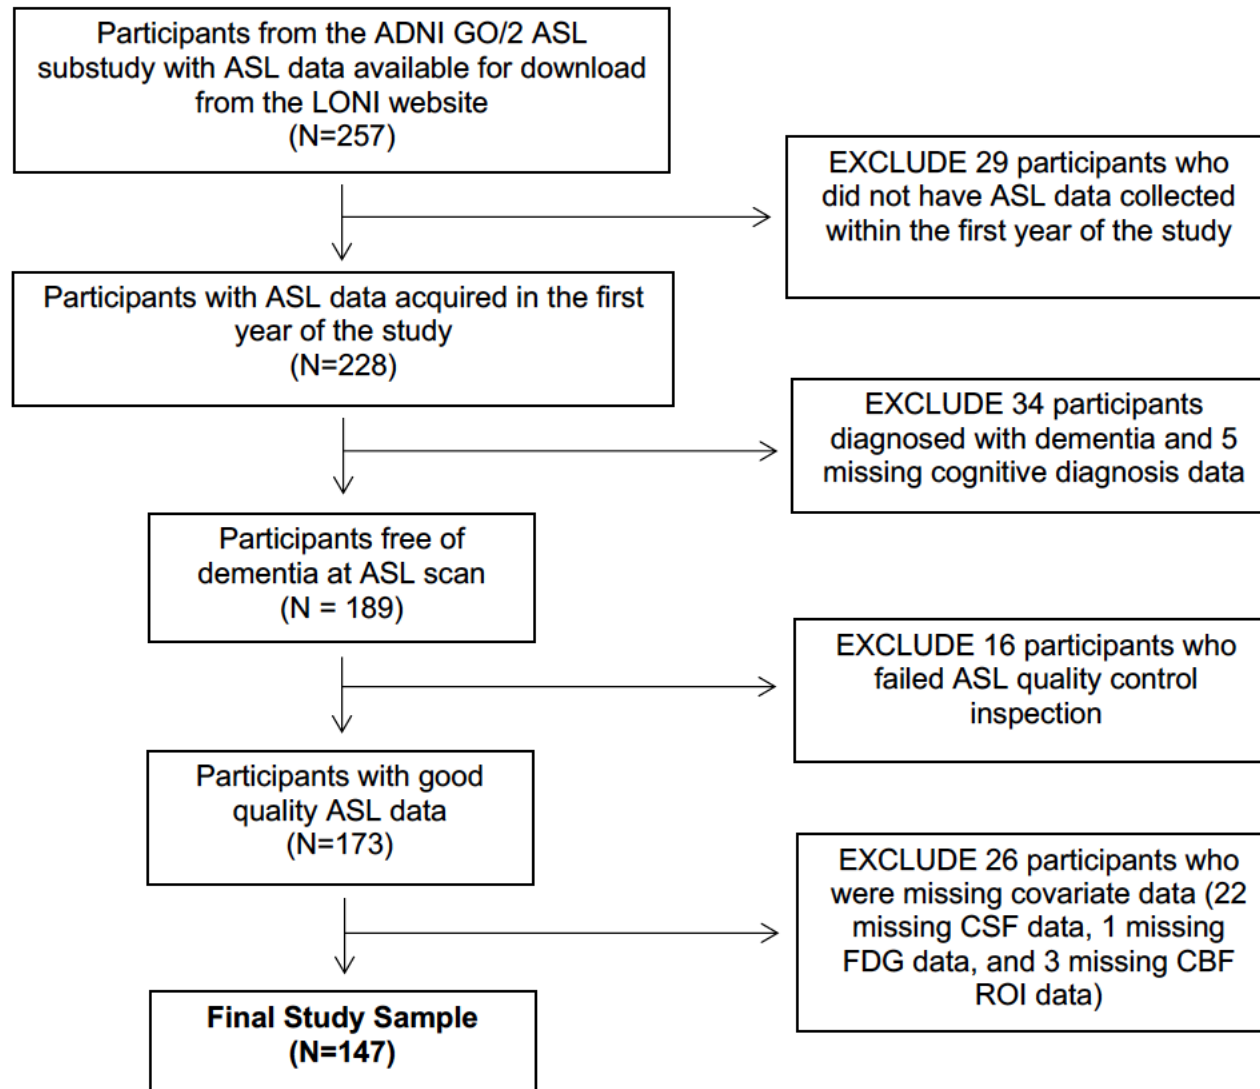

Supplement: NIHMS1771405-supplement-1.pdf [file NIHMS1771405-supplement-1.pdf]
